# Supplementary material for: Prescription Practices in the Treatment of First-Episode Schizophrenia Spectrum Disorders: Data From the National RAISE-ETP Study
Source: Atypon-hosted journal article supplement (doi:10.1176/appi.ajp.2014.13101355), 2014-12-17
Supplement: appi.ajp.2014.13101355.ds001.pdf [file appi.ajp.2014.13101355.ds001.pdf]

**FIGURE S1. Enrollment RAISE-ETP Study**

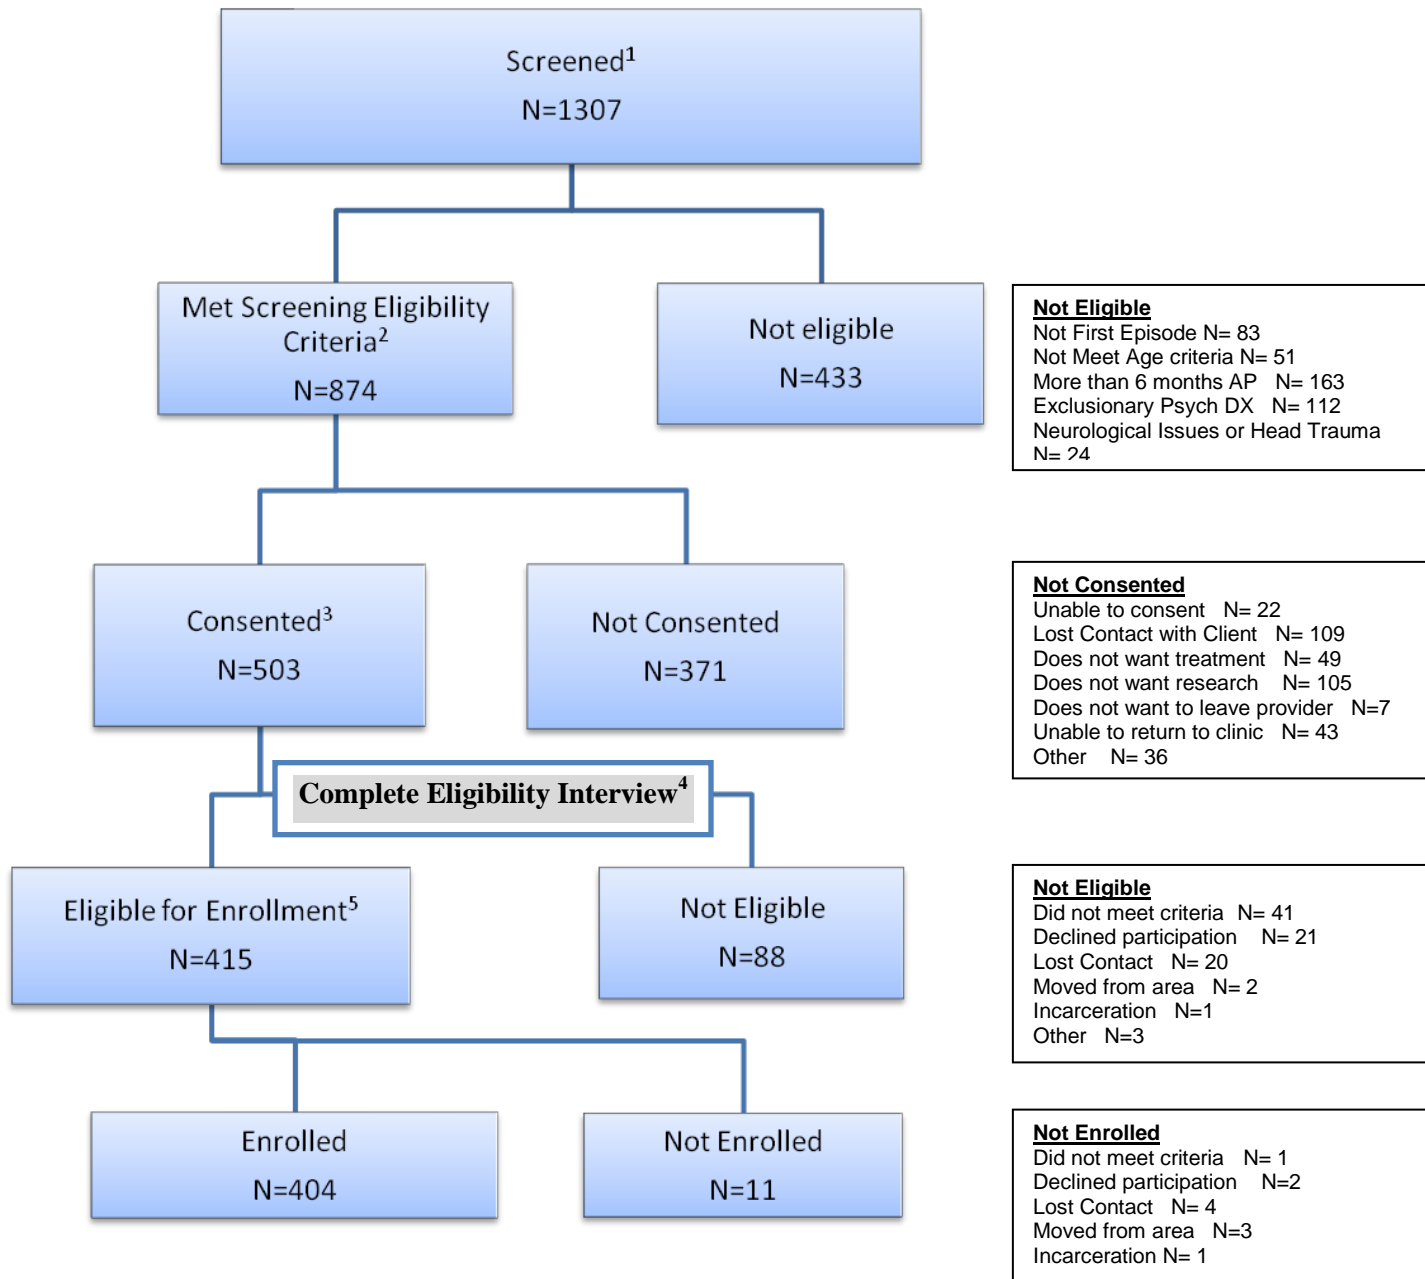

**Notes:**

<sup>1</sup> Potential research subjects contacted by research staff.

<sup>2</sup> Potential subjects meeting brief (pre-consent) checklist.

<sup>3</sup> Potential subjects who signed informed consent and agreed to participate in study if eligibility criteria are met.

<sup>4</sup> After consent, subjects have a diagnostic eligibility interview during which major inclusion and exclusion criteria are assessed.

<sup>5</sup> For subjects meeting eligibility on the diagnostic interview, enrollment into treatment occurs at the end of the Baseline 2 visit, during which the final eligibility criteria are assessed.

**TABLE S1. Factors Associated With Prescription Patterns**

|                                                                                                 | Univariate |                   | Multivariate |                      |                             |                                  |                                         |
|-------------------------------------------------------------------------------------------------|------------|-------------------|--------------|----------------------|-----------------------------|----------------------------------|-----------------------------------------|
|                                                                                                 | Odds Ratio | Credible Interval | Selected %   | Posterior Odds Ratio | Posterior Credible Interval | Conditional Posterior Odds Ratio | Conditional Posterior Credible Interval |
| <b>Prescription of an Antipsychotic</b>                                                         |            |                   |              |                      |                             |                                  |                                         |
| odds ratios based upon 0 = not prescribed an antipsychotic and 1 = prescribed an antipsychotic. |            |                   |              |                      |                             |                                  |                                         |
| <b>Region</b>                                                                                   |            |                   |              |                      |                             |                                  |                                         |
| West vs. Midwest                                                                                | 0.98       | 0.51, 1.82        | 1.9%         | 0.99                 | 0.89, 1.11                  | 0.75                             | 0.40, 1.37                              |
| South vs. Midwest                                                                               | 2.06       | 0.92, 4.39        | 6.9%         | 1.05                 | 0.71, 1.55                  | 1.98                             | 0.93, 4.21                              |
| North vs. Midwest                                                                               | 1.39       | 0.58, 2.65        | 1.4%         | 1.00                 | 0.91, 1.11                  | 1.22                             | 0.58, 2.57                              |
| North vs. South                                                                                 | 0.72       | 0.58, 2.65        | 6.8%         | 0.95                 | 0.65, 1.41                  | 0.51                             | 0.24, 1.08                              |
| North vs. West                                                                                  | 1.39       | 0.6, 2.72         | 1.9%         | 1.01                 | 0.89, 1.13                  | 1.36                             | 0.73, 2.53                              |
| South vs. West                                                                                  | 2.06       | 0.82, 4.31        | 1.9%         | 1.01                 | 0.89, 1.14                  | 1.36                             | 0.73, 2.54                              |
| <b>Sex</b>                                                                                      |            |                   |              |                      |                             |                                  |                                         |
| Female vs. Male                                                                                 | 0.58       | 0.37, 0.99        | 16.6%        | 0.92                 | 0.60, 1.41                  | 0.61                             | 0.35, 1.08                              |
| <b>Age</b>                                                                                      | 0.99       | 0.95, 1.04        | 5.4%         | 1.0                  | 0.99, 1.01                  | 0.99                             | 0.94, 1.04                              |
| <b>Race</b>                                                                                     |            |                   |              |                      |                             |                                  |                                         |
| Others vs. Caucasian                                                                            | 0.8        | 0.3, 1.83         | 2.4%         | 0.99                 | 0.84, 1.17                  | 0.74                             | 0.31, 1.80                              |
| African American vs. Caucasian                                                                  | 1.05       | 0.59, 1.71        | 2.2%         | 1.00                 | 0.92, 1.10                  | 1.14                             | 0.65, 2.01                              |
| Others vs. African American                                                                     | 0.77       | 0.36, 2.02        | 2.4%         | 0.99                 | 0.84, 1.17                  | 0.74                             | 0.31, 1.80                              |
| <b>Ethnicity</b>                                                                                |            |                   |              |                      |                             |                                  |                                         |
| Hispanic vs. non-Hispanic                                                                       | 1.01       | 0.57, 2.11        | 4.6%         | 1.00                 | 0.86, 1.16                  | 0.99                             | 0.50, 1.96                              |
| <b>Diagnosis</b>                                                                                |            |                   |              |                      |                             |                                  |                                         |
| Psychosis NOS vs. Schizophrenia                                                                 | 1.19       | 0.4, 2.94         | 1.3%         | 1.00                 | 0.90, 1.12                  | 1.20                             | 0.48, 3.01                              |
| Schizophreniform vs. Schizophrenia                                                              | 2.36       | 1.14, 7.35        | 15.1%        | 1.16                 | 0.52, 2.58                  | 2.73                             | 1.05, 7.10                              |
| Schizoaffective vs. Schizophrenia                                                               | 0.62       | 0.36, 1.07        | 6.5%         | 0.96                 | 0.70, 1.33                  | 0.55                             | 0.30, 1.02                              |
| Schizoaffective vs. Schizophreniform                                                            | 0.29       | 0.13, 0.68        | 6.2%         | 0.96                 | 0.70, 1.33                  | 0.55                             | 0.30, 1.00                              |
| Psychosis NOS vs. Schizophreniform                                                              | 0.58       | 0.2, 1.56         | 1.0%         | 1.00                 | 0.91, 1.10                  | 1.18                             | 0.47, 2.94                              |

|                                                                                                                    | Univariate |                   | Multivariate |                      |                             |                                  |                                         |
|--------------------------------------------------------------------------------------------------------------------|------------|-------------------|--------------|----------------------|-----------------------------|----------------------------------|-----------------------------------------|
|                                                                                                                    | Odds Ratio | Credible Interval | Selected %   | Posterior Odds Ratio | Posterior Credible Interval | Conditional Posterior Odds Ratio | Conditional Posterior Credible Interval |
| Schizoaffective vs. Psychosis NOS                                                                                  | 0.52       | 0.22, 1.36        | 6.6%         | 0.96                 | 0.68, 1.35                  | 0.55                             | 0.29, 1.04                              |
| <b>Insurance status</b>                                                                                            |            |                   |              |                      |                             |                                  |                                         |
| Private vs. Uninsured                                                                                              | 1.19       | 0.55, 2.33        | 3.4%         | 1.01                 | 0.83, 1.23                  | 1.47                             | 0.69, 3.11                              |
| Public only vs. Uninsured                                                                                          | 0.57       | 0.35, 1.03        | 21.2%        | 0.87                 | 0.49, 1.54                  | 0.53                             | 0.31, 0.91                              |
| Private vs. Public                                                                                                 | 2.04       | 1.1, 4.61         | 4.1%         | 1.02                 | 0.80, 1.29                  | 1.58                             | 0.73, 3.39                              |
| <b>Prescription Of More Than One Antipsychotic For Subjects Prescribed Antipsychotics</b>                          |            |                   |              |                      |                             |                                  |                                         |
| Odds ratios based upon 0 = prescription for one antipsychotic and 1 = prescription for two or more antipsychotics. |            |                   |              |                      |                             |                                  |                                         |
| Prescriptions for more than one formulation of an agent were counted as a prescription for a single agent          |            |                   |              |                      |                             |                                  |                                         |
| <b>Region</b>                                                                                                      |            |                   |              |                      |                             |                                  |                                         |
| West vs. Midwest                                                                                                   | 1.31       | 0.46, 3.16        | 1.3%         | 1.00                 | 0.91, 1.11                  | 1.03                             | 0.43, 2.44                              |
| South vs. Midwest                                                                                                  | 2.08       | 1.05, 4.71        | 4.6%         | 1.03                 | 0.76, 1.39                  | 1.86                             | 0.88, 3.94                              |
| North vs. Midwest                                                                                                  | 1.23       | 0.45, 3.17        | 1.3%         | 1.00                 | 0.90, 1.11                  | 0.91                             | 0.36, 2.31                              |
| North vs. South                                                                                                    | 0.63       | 0.45, 3.17        | 4.6%         | 0.97                 | 0.72, 1.31                  | 0.54                             | 0.25, 1.14                              |
| North vs. West                                                                                                     | 0.94       | 0.3, 2.36         | 1.3%         | 1.00                 | 0.90, 1.11                  | 0.98                             | 0.41, 2.35                              |
| South vs. West                                                                                                     | 1.57       | 0.54, 3.54        | 1.3%         | 1.00                 | 0.90, 1.10                  | 0.99                             | 0.42, 2.36                              |
| <b>Sex</b>                                                                                                         |            |                   |              |                      |                             |                                  |                                         |
| Female vs. Male                                                                                                    | 1.09       | 0.58, 2.25        | 5.1%         | 1.00                 | 0.84, 1.20                  | 1.05                             | 0.48, 2.29                              |
| <b>Age</b>                                                                                                         | 1.04       | 0.98, 1.10        | 9.9%         | 1.00                 | 0.97, 1.03                  | 1.04                             | 0.98, 1.11                              |
| <b>Race</b>                                                                                                        |            |                   |              |                      |                             |                                  |                                         |
| Others vs. Caucasian                                                                                               | 0.12       | 0.01, 2.30        | 38.7%        | 0.00                 | 0.00, >10                   | 0.00                             | 0.00, >10                               |
| African American vs. Caucasian                                                                                     | 1.6        | 0.96, 2.81        | 8.5%         | 1.01                 | 0.81, 1.26                  | 1.83                             | 0.91, 3.70                              |
| Others vs. African American                                                                                        | 0.08       | 0.01, 1.59        | 40.7%        | 0.00                 | 0.00, >10                   | 0.00                             | 0.00, >10                               |
| <b>Ethnicity</b>                                                                                                   |            |                   |              |                      |                             |                                  |                                         |
| Hispanic vs. non-Hispanic                                                                                          | 0.87       | 0.4, 2.30         | 5.2%         | 1.01                 | 0.81, 1.26                  | 0.88                             | 0.35, 2.27                              |
| <b>Diagnosis</b>                                                                                                   |            |                   |              |                      |                             |                                  |                                         |
| Psychosis NOS vs. Schizophrenia                                                                                    | 0.95       | 0.29, 2.81        | 1.3%         | 1.00                 | 0.88, 1.13                  | 0.99                             | 0.33, 2.99                              |

|                                                                                                                                                                          | Univariate |                   | Multivariate |                      |                             |                                  |                                         |
|--------------------------------------------------------------------------------------------------------------------------------------------------------------------------|------------|-------------------|--------------|----------------------|-----------------------------|----------------------------------|-----------------------------------------|
|                                                                                                                                                                          | Odds Ratio | Credible Interval | Selected %   | Posterior Odds Ratio | Posterior Credible Interval | Conditional Posterior Odds Ratio | Conditional Posterior Credible Interval |
| Schizophreniform vs. Schizophrenia                                                                                                                                       | 0.55       | 0.25, 1.75        | 3.0%         | 0.98                 | 0.73, 1.31                  | 0.52                             | 0.18, 1.53                              |
| Schizoaffective vs. Schizophrenia                                                                                                                                        | 1.13       | 0.56, 2.62        | 1.5%         | 1.00                 | 0.89, 1.13                  | 1.28                             | 0.55, 2.99                              |
| Schizoaffective vs. Schizophreniform                                                                                                                                     | 1.88       | 0.71, 5.28        | 0.7%         | 1.00                 | 0.92, 1.09                  | 1.31                             | 0.56, 3.02                              |
| Psychosis NOS vs. Schizophreniform                                                                                                                                       | 1.55       | 0.45, 4.68        | 0.6%         | 1.00                 | 0.92, 1.09                  | 1.01                             | 0.34, 3.03                              |
| Schizoaffective vs. Psychosis NOS                                                                                                                                        | 1.22       | 0.42, 3.94        | 1.6%         | 1.00                 | 0.89, 1.13                  | 1.29                             | 0.55, 3.01                              |
| <b>Insurance status</b>                                                                                                                                                  |            |                   |              |                      |                             |                                  |                                         |
| Private vs. Uninsured                                                                                                                                                    | 0.25       | 0.07, 0.83        | 51.9%        | 0.42                 | 0.06, 2.92                  | 0.19                             | 0.04, 0.82                              |
| Public only vs. Uninsured                                                                                                                                                | 1.33       | 0.7, 2.51         | 4.5%         | 1.02                 | 0.80, 1.31                  | 1.58                             | 0.74, 3.39                              |
| Private vs. Public                                                                                                                                                       | 0.2        | 0.07, 0.79        | 52.9%        | 0.42                 | 0.06, 2.89                  | 0.19                             | 0.04, 0.82                              |
| <b>Prescription For Only Oral Versus Long Acting Or Long Acting Plus Oral Formulations For Subjects Prescribed Antipsychotics</b>                                        |            |                   |              |                      |                             |                                  |                                         |
| Odds ratios based upon 0 = prescription for only oral formulation and 1 = prescription for only long acting formulation or long acting formulation plus oral formulation |            |                   |              |                      |                             |                                  |                                         |
| <b>Region</b>                                                                                                                                                            |            |                   |              |                      |                             |                                  |                                         |
| West vs. Midwest                                                                                                                                                         | 0.2        | 0.05, 0.65        | 20.9%        | 0.73                 | 0.19, 2.88                  | 0.22                             | 0.05, 0.97                              |
| South vs. Midwest                                                                                                                                                        | 0.57       | 0.26, 1.31        | 1.6%         | 1.00                 | 0.87, 1.14                  | 0.77                             | 0.3, 2.00                               |
| North vs. Midwest                                                                                                                                                        | 0.45       | 0.13, 1.13        | 2.1%         | 0.99                 | 0.79, 1.23                  | 0.60                             | 0.19, 1.85                              |
| North vs. South                                                                                                                                                          | 0.79       | 0.13, 1.13        | 1.9%         | 1.00                 | 0.83, 1.21                  | 0.90                             | 0.23, 3.51                              |
| North vs. West                                                                                                                                                           | 1.79       | 0.38, 5.96        | 15.7%        | 1.26                 | 0.38, 4.17                  | 4.31                             | 0.97, > 10                              |
| South vs. West                                                                                                                                                           | 2.37       | 0.53, 6.9         | 15.9%        | 1.26                 | 0.38, 4.21                  | 4.32                             | 0.97, >10                               |
| <b>Sex</b>                                                                                                                                                               |            |                   |              |                      |                             |                                  |                                         |
| Female vs. Male                                                                                                                                                          | 2.41       | 1.3, 4.88         | 40.2%        | 1.43                 | 0.54, 3.79                  | 2.42                             | 1.14, 5.16                              |
| <b>Age</b>                                                                                                                                                               | 1.03       | 0.97, 1.1         | 6.2%         | 1.00                 | 0.98, 1.02                  | 1.02                             | 0.96, 1.09                              |
| <b>Race</b>                                                                                                                                                              |            |                   |              |                      |                             |                                  |                                         |
| Others vs. Caucasian                                                                                                                                                     | 0.53       | 0.08, 2.56        | 4.1%         | 0.96                 | 0.53, 1.72                  | 0.35                             | 0.04, 2.73                              |

|                                                                                                                                                                                                             | Univariate |                   | Multivariate |                      |                             |                                  |                                         |
|-------------------------------------------------------------------------------------------------------------------------------------------------------------------------------------------------------------|------------|-------------------|--------------|----------------------|-----------------------------|----------------------------------|-----------------------------------------|
|                                                                                                                                                                                                             | Odds Ratio | Credible Interval | Selected %   | Posterior Odds Ratio | Posterior Credible Interval | Conditional Posterior Odds Ratio | Conditional Posterior Credible Interval |
| African American vs. Caucasian                                                                                                                                                                              | 1.82       | 0.87, 3.48        | 9.7%         | 1.07                 | 0.67, 1.69                  | 1.98                             | 0.93, 4.24                              |
| Others vs. African American                                                                                                                                                                                 | 0.32       | 0.07, 1.94        | 4.4%         | 0.95                 | 0.52, 1.76                  | 0.34                             | 0.04, 2.63                              |
| <b>Ethnicity</b>                                                                                                                                                                                            |            |                   |              |                      |                             |                                  |                                         |
| Hispanic vs. non-Hispanic                                                                                                                                                                                   | 0.65       | 0.27, 1.99        | 6.5%         | 1.02                 | 0.73, 1.44                  | 0.69                             | 0.22, 2.13                              |
| <b>Diagnosis</b>                                                                                                                                                                                            |            |                   |              |                      |                             |                                  |                                         |
| Psychosis NOS vs. Schizophrenia                                                                                                                                                                             | 0.92       | 0.26, 3.46        | 1.4%         | 1.00                 | 0.86, 1.16                  | 0.90                             | 0.25, 3.19                              |
| Schizophreniform vs. Schizophrenia                                                                                                                                                                          | 1.07       | 0.53, 3.07        | 1.3%         | 1.00                 | 0.90, 1.12                  | 1.06                             | 0.41, 2.73                              |
| Schizoaffective vs. Schizophrenia                                                                                                                                                                           | 1.29       | 0.59, 2.98        | 1.5%         | 1.00                 | 0.89, 1.13                  | 1.20                             | 0.47, 3.04                              |
| Schizoaffective vs. Schizophreniform                                                                                                                                                                        | 1.2        | 0.46, 3.46        | 0.8%         | 1.00                 | 0.91, 1.10                  | 1.20                             | 0.47, 3.02                              |
| Psychosis NOS vs. Schizophreniform                                                                                                                                                                          | 0.87       | 0.24, 2.69        | 0.8%         | 1.00                 | 0.89, 1.12                  | 0.90                             | 0.25, 3.17                              |
| Schizoaffective vs. Psychosis NOS                                                                                                                                                                           | 1.34       | 0.47, 4.85        | 1.5%         | 1.00                 | 0.89, 1.13                  | 1.20                             | 0.47, 3.04                              |
| <b>Insurance status</b>                                                                                                                                                                                     |            |                   |              |                      |                             |                                  |                                         |
| Private vs. Uninsured                                                                                                                                                                                       | 0.58       | 0.19, 1.49        | 5.7%         | 0.96                 | 0.62, 1.48                  | 0.47                             | 0.15, 1.46                              |
| Public only vs. Uninsured                                                                                                                                                                                   | 1.3        | 0.7, 3.02         | 3.2%         | 1.01                 | 0.84, 1.22                  | 1.43                             | 0.65, 3.10                              |
| Private vs. Public                                                                                                                                                                                          | 0.46       | 0.19, 1.50        | 5.7%         | 0.96                 | 0.62, 1.48                  | 0.47                             | 0.15, 1.45                              |
| <b>Prescription For A First Generation Antipsychotic For Subjects Prescribed Antipsychotics</b>                                                                                                             |            |                   |              |                      |                             |                                  |                                         |
| Odds ratios based upon 0 = prescription solely for second generation antipsychotics and 1 = prescription for a first generation antipsychotic either alone or in combination with a second generation agent |            |                   |              |                      |                             |                                  |                                         |
| <b>Region</b>                                                                                                                                                                                               |            |                   |              |                      |                             |                                  |                                         |
| West vs. Midwest                                                                                                                                                                                            | 0.46       | 0.16, 1.29        | 4.8%         | 0.96                 | 0.64, 1.44                  | 0.46                             | 0.16, 1.27                              |
| South vs. Midwest                                                                                                                                                                                           | 1.06       | 0.55, 2.33        | 1.8%         | 1.00                 | 0.87, 1.14                  | 0.75                             | 0.31, 1.82                              |
| North vs. Midwest                                                                                                                                                                                           | 0.58       | 0.23, 1.53        | 1.5%         | 1.00                 | 0.87, 1.14                  | 0.78                             | 0.28, 2.17                              |
| North vs. South                                                                                                                                                                                             | 0.57       | 0.23, 1.53        | 1.7%         | 1.00                 | 0.87, 1.15                  | 1.25                             | 0.48, 3.27                              |
| North vs. West                                                                                                                                                                                              | 1.15       | 0.32, 3.17        | 4.5%         | 1.04                 | 0.71, 1.52                  | 2.16                             | 0.76, 6.12                              |
| South vs. West                                                                                                                                                                                              | 2.15       | 0.66, 5.14        | 4.5%         | 1.04                 | 0.71, 1.52                  | 2.16                             | 0.76, 6.11                              |

|                                                                                                                                    | Univariate |                   | Multivariate |                      |                             |                                  |                                         |
|------------------------------------------------------------------------------------------------------------------------------------|------------|-------------------|--------------|----------------------|-----------------------------|----------------------------------|-----------------------------------------|
|                                                                                                                                    | Odds Ratio | Credible Interval | Selected %   | Posterior Odds Ratio | Posterior Credible Interval | Conditional Posterior Odds Ratio | Conditional Posterior Credible Interval |
| <b>Sex</b>                                                                                                                         |            |                   |              |                      |                             |                                  |                                         |
| Female vs. Male                                                                                                                    | 1.64       | 0.93, 3.20        | 11.5%        | 1.06                 | 0.71, 1.58                  | 1.65                             | 0.79, 3.44                              |
| <b>Age</b>                                                                                                                         | 1.00       | 0.95, 1.07        | 5.8%         | 1.00                 | 0.98, 1.02                  | 0.98                             | 0.91, 1.06                              |
| <b>Race</b>                                                                                                                        |            |                   |              |                      |                             |                                  |                                         |
| Others vs. Caucasian                                                                                                               | 0.87       | 0.22, 3.58        | 2.9%         | 0.98                 | 0.67, 1.43                  | 0.56                             | 0.12, 2.64                              |
| African American vs. Caucasian                                                                                                     | 2.38       | 1.41, 4.41        | 23.1%        | 0.97                 | 0.72, 1.32                  | 2.25                             | 1.11, 4.56                              |
| Others vs. African American                                                                                                        | 0.41       | 0.12, 1.73        | 3.4%         | 0.98                 | 0.67, 1.43                  | 0.49                             | 0.10, 2.32                              |
| <b>Ethnicity</b>                                                                                                                   |            |                   |              |                      |                             |                                  |                                         |
| Hispanic vs. non-Hispanic                                                                                                          | 1.57       | 0.82, 3.59        | 7.3%         | 0.97                 | 0.72, 1.32                  | 1.47                             | 0.62, 3.45                              |
| <b>Diagnosis</b>                                                                                                                   |            |                   |              |                      |                             |                                  |                                         |
| Psychosis NOS vs. Schizophrenia                                                                                                    | 1.69       | 0.58, 4.38        | 2.0%         | 1.01                 | 0.83, 1.23                  | 1.63                             | 0.60, 4.43                              |
| Schizophreniform vs. Schizophrenia                                                                                                 | 0.78       | 0.36, 2.45        | 1.8%         | 0.99                 | 0.84, 1.18                  | 0.67                             | 0.24, 1.85                              |
| Schizoaffective vs. Schizophrenia                                                                                                  | 1.88       | 0.93, 4.07        | 6.7%         | 1.05                 | 0.68, 1.62                  | 2.16                             | 0.97, 4.80                              |
| Schizoaffective vs. Schizophreniform                                                                                               | 2.21       | 0.86, 5.36        | 5.7%         | 1.04                 | 0.70, 1.55                  | 2.15                             | 0.97, 4.79                              |
| Psychosis NOS vs. Schizophreniform                                                                                                 | 1.98       | 0.69, 5.29        | 1.1%         | 1.00                 | 0.88, 1.15                  | 1.57                             | 0.59, 4.19                              |
| Schizoaffective vs. Psychosis NOS                                                                                                  | 1.16       | 0.46, 3.25        | 6.5%         | 1.05                 | 0.69, 1.60                  | 2.15                             | 0.97, 4.79                              |
| <b>Insurance status</b>                                                                                                            |            |                   |              |                      |                             |                                  |                                         |
| Private vs. Uninsured                                                                                                              | 0.09       | 0.02, 0.37        | 96.2%        | 0.08                 | 0.01, 0.71                  | 0.07                             | 0.01, 0.53                              |
| Public only vs. Uninsured                                                                                                          | 0.35       | 0.16, 0.78        | 56.4%        | 0.52                 | 0.13, 4.02                  | 0.31                             | 0.13, 0.75                              |
| Private vs. Public                                                                                                                 | 0.25       | 0.07, 1.46        | 16.7%        | 0.72                 | 0.13, 4.04                  | 0.13                             | 0.01, 1.25                              |
| <b>Prescription For Risperidone Among Subjects Prescribed Only One Oral Antipsychotic</b>                                          |            |                   |              |                      |                             |                                  |                                         |
| Odds ratios based upon 0 = prescription for an oral antipsychotic other than risperidone and 1 = prescription for oral risperidone |            |                   |              |                      |                             |                                  |                                         |
| <b>Region</b>                                                                                                                      |            |                   |              |                      |                             |                                  |                                         |

|                                      | Univariate |                   | Multivariate |                      |                             |                                  |                                         |
|--------------------------------------|------------|-------------------|--------------|----------------------|-----------------------------|----------------------------------|-----------------------------------------|
|                                      | Odds Ratio | Credible Interval | Selected %   | Posterior Odds Ratio | Posterior Credible Interval | Conditional Posterior Odds Ratio | Conditional Posterior Credible Interval |
| West vs. Midwest                     | 0.7        | 0.4, 1.29         | 2.9%         | 0.99                 | 0.84, 1.16                  | 0.69                             | 0.37, 1.28                              |
| South vs. Midwest                    | 0.98       | 0.55, 1.68        | 2.0%         | 1.01                 | 0.90, 1.12                  | 1.29                             | 0.73, 2.31                              |
| North vs. Midwest                    | 0.65       | 0.3, 1.36         | 2.6%         | 0.99                 | 0.85, 1.16                  | 0.69                             | 0.36, 1.34                              |
| North vs. South                      | 0.67       | 0.32, 1.36        | 2.1%         | 0.99                 | 0.88, 1.12                  | 0.76                             | 0.42, 1.38                              |
| North vs. West                       | 0.92       | 0.4, 1.74         | 2.9%         | 1.01                 | 0.86, 1.18                  | 1.44                             | 0.78, 2.66                              |
| South vs. West                       | 1.39       | 0.64, 2.56        | 2.9%         | 1.01                 | 0.86, 1.19                  | 1.45                             | 0.78, 2.70                              |
| <b>Sex</b>                           |            |                   |              |                      |                             |                                  |                                         |
| Female vs. Male                      | 0.6        | 0.37, 1.04        | 17.0%        | 0.92                 | 0.60, 1.42                  | 0.62                             | 0.34, 1.13                              |
| <b>Age</b>                           | 0.94       | 0.90, 0.99        | 66.4%        | 0.95                 | 0.88, 1.03                  | 0.93                             | 0.88, 0.98                              |
| <b>Race</b>                          |            |                   |              |                      |                             |                                  |                                         |
| Others vs. Caucasian                 | 2.59       | 1.05, 5.50        | 17.5%        | 1.17                 | 0.56, 2.43                  | 2.39                             | 1.06, 5.41                              |
| African American vs. Caucasian       | 1.18       | 0.7, 1.84         | 2.4%         | 1.00                 | 0.92, 1.09                  | 1.10                             | 0.65, 1.87                              |
| Others vs. African American          | 2.19       | 0.97, 5.29        | 16.9%        | 1.16                 | 0.56, 2.38                  | 2.38                             | 1.05, 5.38                              |
| <b>Ethnicity</b>                     |            |                   |              |                      |                             |                                  |                                         |
| Hispanic vs. non-Hispanic            | 1.7        | 1.03, 3.2         | 17.5%        | 0.92                 | 0.58, 1.44                  | 1.67                             | 0.89, 3.03                              |
| <b>Diagnosis</b>                     |            |                   |              |                      |                             |                                  |                                         |
| Psychosis NOS vs. Schizophrenia      | 0.77       | 0.34, 1.79        | 1.9%         | 0.99                 | 0.87, 1.14                  | 0.73                             | 0.33, 1.63                              |
| Schizophreniform vs. Schizophrenia   | 1.22       | 0.75, 2.22        | 2.0%         | 1.01                 | 0.90, 1.13                  | 1.31                             | 0.71, 2.44                              |
| Schizoaffective vs. Schizophrenia    | 0.68       | 0.43, 1.35        | 3.5%         | 0.98                 | 0.80, 1.21                  | 0.63                             | 0.32, 1.24                              |
| Schizoaffective vs. Schizophreniform | 0.58       | 0.29, 1.20        | 2.8%         | 0.99                 | 0.82, 1.19                  | 0.63                             | 0.32, 1.24                              |
| Psychosis NOS vs. Schizophreniform   | 0.65       | 0.28, 1.38        | 1.5%         | 1.00                 | 0.88, 1.13                  | 0.73                             | 0.33, 1.62                              |
| Schizoaffective vs. Psychosis NOS    | 0.87       | 0.38, 2.21        | 3.4%         | 0.98                 | 0.80, 1.21                  | 0.63                             | 0.32, 1.25                              |
| <b>Insurance status</b>              |            |                   |              |                      |                             |                                  |                                         |
| Private vs. Uninsured                | 1.58       | 0.87, 2.64        | 3.7%         | 1.01                 | 0.87, 1.18                  | 1.34                             | 0.75, 2.40                              |

|                                                                                                                                  | Univariate |                   | Multivariate |                      |                             |                                  |                                         |
|----------------------------------------------------------------------------------------------------------------------------------|------------|-------------------|--------------|----------------------|-----------------------------|----------------------------------|-----------------------------------------|
|                                                                                                                                  | Odds Ratio | Credible Interval | Selected %   | Posterior Odds Ratio | Posterior Credible Interval | Conditional Posterior Odds Ratio | Conditional Posterior Credible Interval |
| Public only vs. Uninsured                                                                                                        | 1.41       | 0.86, 2.53        | 3.0%         | 1.01                 | 0.90, 1.13                  | 1.23                             | 0.72, 2.10                              |
| Private vs. Public                                                                                                               | 1.13       | 0.66, 2.28        | 3.5%         | 1.01                 | 0.87, 1.17                  | 1.32                             | 0.73, 2.38                              |
| <b>Prescription For Olanzapine Among Subjects Prescribed Only One Oral Antipsychotic</b>                                         |            |                   |              |                      |                             |                                  |                                         |
| Odds ratios based upon 0 = prescription for an oral antipsychotic other than olanzapine and 1 = prescription for oral olanzapine |            |                   |              |                      |                             |                                  |                                         |
| <b>Region</b>                                                                                                                    |            |                   |              |                      |                             |                                  |                                         |
| West vs. Midwest                                                                                                                 | 1.95       | 0.89, 3.7         | 21.4%        | 1.20                 | 0.57, 2.50                  | 2.30                             | 1.19, 4.47                              |
| South vs. Midwest                                                                                                                | 0.52       | 0.18, 1.12        | 15.1%        | 0.86                 | 0.40, 1.86                  | 0.38                             | 0.15, 0.96                              |
| North vs. Midwest                                                                                                                | 1.22       | 0.53, 2.79        | 1.7%         | 1.00                 | 0.88, 1.14                  | 1.26                             | 0.52, 3.02                              |
| North vs. South                                                                                                                  | 2.13       | 0.53, 2.79        | 15.6%        | 1.16                 | 0.53, 2.54                  | 2.65                             | 1.05, 6.67                              |
| North vs. West                                                                                                                   | 0.66       | 0.27, 1.47        | 21.1%        | 0.84                 | 0.40, 1.74                  | 0.43                             | 0.22, 0.84                              |
| South vs. West                                                                                                                   | 0.28       | 0.11, 0.58        | 23.9%        | 0.82                 | 0.38, 1.78                  | 0.43                             | 0.22, 0.83                              |
| <b>Sex</b>                                                                                                                       |            |                   |              |                      |                             |                                  |                                         |
| Female vs. Male                                                                                                                  | 0.77       | 0.42, 1.54        | 6.3%         | 0.99                 | 0.79, 1.23                  | 0.80                             | 0.37, 1.72                              |
| <b>Age</b>                                                                                                                       | 1.01       | 0.96, 1.07        | 5.6%         | 1.00                 | 0.99, 1.02                  | 1.01                             | 0.95, 1.07                              |
| <b>Race</b>                                                                                                                      |            |                   |              |                      |                             |                                  |                                         |
| Others vs. Caucasian                                                                                                             | 1.25       | 0.43, 3.07        | 2.9%         | 1.01                 | 0.82, 1.24                  | 1.46                             | 0.55, 3.87                              |
| African American vs. Caucasian                                                                                                   | 0.65       | 0.33, 1.20        | 6.5%         | 0.97                 | 0.71, 1.31                  | 0.60                             | 0.30, 1.21                              |
| Others vs. African American                                                                                                      | 1.83       | 0.66, 5.24        | 3.0%         | 1.01                 | 0.81, 1.26                  | 1.5                              | 0.56, 4.01                              |
| <b>Ethnicity</b>                                                                                                                 |            |                   |              |                      |                             |                                  |                                         |
| Hispanic vs. non-Hispanic                                                                                                        | 1.07       | 0.56, 2.41        | 5.5%         | 1.00                 | 0.83, 1.21                  | 1.00                             | 0.44, 2.26                              |
| <b>Diagnosis</b>                                                                                                                 |            |                   |              |                      |                             |                                  |                                         |
| Psychosis NOS vs. Schizophrenia                                                                                                  | 0.58       | 0.18, 2.08        | 3.2%         | 0.98                 | 0.69, 1.38                  | 0.47                             | 0.14, 1.62                              |
| Schizophreniform vs. Schizophrenia                                                                                               | 1.96       | 1.11, 3.86        | 8.4%         | 1.06                 | 0.68, 1.65                  | 2.04                             | 1.00, 4.15                              |
| Schizoaffective vs. Schizophrenia                                                                                                | 0.95       | 0.51, 2.16        | 1.4%         | 1.00                 | 0.90, 1.11                  | 0.89                             | 0.38, 2.04                              |
| Schizoaffective vs. Schizophreniform                                                                                             | 0.52       | 0.23, 1.23        | 1.1%         | 1.00                 | 0.91, 1.09                  | 0.87                             | 0.38, 1.99                              |
| Psychosis NOS vs. Schizophreniform                                                                                               | 0.32       | 0.10, 0.95        | 2.4%         | 0.98                 | 0.73, 1.32                  | 0.47                             | 0.14, 1.60                              |



|                                                                                                             | Univariate |                   | Multivariate |                      |                             |                                  |                                         |
|-------------------------------------------------------------------------------------------------------------|------------|-------------------|--------------|----------------------|-----------------------------|----------------------------------|-----------------------------------------|
|                                                                                                             | Odds Ratio | Credible Interval | Selected %   | Posterior Odds Ratio | Posterior Credible Interval | Conditional Posterior Odds Ratio | Conditional Posterior Credible Interval |
| Schizoaffective vs. Psychosis NOS                                                                           | 1.43       | 0.43, 5.01        | 1.4%         | 1.00                 | 0.90, 1.11                  | 0.89                             | 0.38, 2.04                              |
| <b>Insurance status</b>                                                                                     |            |                   |              |                      |                             |                                  |                                         |
| Private vs. Uninsured                                                                                       | 0.97       | 0.45, 1.75        | 2.3%         | 1.00                 | 0.90, 1.12                  | 1.10                             | 0.53, 2.26                              |
| Public only vs. Uninsured                                                                                   | 0.67       | 0.35, 1.48        | 4.2%         | 0.98                 | 0.79, 1.22                  | 0.67                             | 0.32, 1.38                              |
| Private vs. Public                                                                                          | 1.41       | 0.7, 3.61         | 2.3%         | 1.00                 | 0.89, 1.13                  | 1.11                             | 0.53, 2.31                              |
| <b>Prescription For An Antidepressant</b>                                                                   |            |                   |              |                      |                             |                                  |                                         |
| Odds ratios based upon 0 = no prescription for an antidepressant and 1 = prescription for an antidepressant |            |                   |              |                      |                             |                                  |                                         |
| <b>Region</b>                                                                                               |            |                   |              |                      |                             |                                  |                                         |
| West vs. Midwest                                                                                            | 0.99       | 0.39, 1.10        | 1.9%         | 1.00                 | 0.90, 1.10                  | 0.77                             | 0.45, 1.33                              |
| South vs. Midwest                                                                                           | 0.99       | 0.59, 1.63        | 1.8%         | 1.00                 | 0.91, 1.11                  | 1.28                             | 0.76, 2.16                              |
| North vs. Midwest                                                                                           | 0.58       | 0.30, 1.13        | 2.6%         | 0.99                 | 0.85, 1.15                  | 0.69                             | 0.37, 1.26                              |
| North vs. South                                                                                             | 0.60       | 0.30, 1.13        | 1.9%         | 1.00                 | 0.90, 1.10                  | 0.78                             | 0.46, 1.31                              |
| North vs. West                                                                                              | 0.92       | 0.47, 1.58        | 1.8%         | 1.00                 | 0.91, 1.11                  | 1.29                             | 0.75, 2.22                              |
| South vs. West                                                                                              | 1.56       | 0.78, 2.88        | 1.9%         | 1.00                 | 0.91, 1.11                  | 1.30                             | 0.75, 2.23                              |
| <b>Sex</b>                                                                                                  |            |                   |              |                      |                             |                                  |                                         |
| Female vs. Male                                                                                             | 2.19       | 1.51, 3.39        | 83.5%        | 1.85                 | 0.93, 3.68                  | 2.09                             | 1.30, 3.35                              |
| <b>Age</b>                                                                                                  | 1.05       | 1.02, 1.10        | 23.8%        | 1.01                 | 0.97, 1.05                  | 1.04                             | 1.00, 1.09                              |
| <b>Race</b>                                                                                                 |            |                   |              |                      |                             |                                  |                                         |
| Others vs. Caucasian                                                                                        | 0.70       | 0.29, 1.45        | 2.8%         | 0.99                 | 0.83, 1.18                  | 0.71                             | 0.31, 1.59                              |
| African American vs. Caucasian                                                                              | 0.90       | 0.57, 1.35        | 2.3%         | 1.00                 | 0.92, 1.08                  | 0.86                             | 0.55, 1.37                              |
| Others vs. African American                                                                                 | 1.11       | 0.74, 1.70        | 2.7%         | 0.99                 | 0.83, 1.18                  | 0.71                             | 0.32, 1.60                              |
| <b>Ethnicity</b>                                                                                            |            |                   |              |                      |                             |                                  |                                         |
| Hispanic vs. non-Hispanic                                                                                   | 0.66       | 0.40, 1.23        | 7.7%         | 1.02                 | 0.81, 1.29                  | 0.74                             | 0.40, 1.33                              |
| <b>Diagnosis</b>                                                                                            |            |                   |              |                      |                             |                                  |                                         |
| Psychosis NOS vs. Schizophrenia                                                                             | 0.53       | 0.24, 1.30        | 4%           | 0.98                 | 0.73, 1.30                  | 0.54                             | 0.24, 1.24                              |
| Schizophreniform vs. Schizophrenia                                                                          | 1.00       | 0.66, 1.97        | 2.1%         | 1.01                 | 0.89, 1.14                  | 1.36                             | 0.73, 2.56                              |
| Schizoaffective vs. Schizophrenia                                                                           | 1.50       | 0.94, 2.46        | 1.6%         | 1.00                 | 0.91, 1.10                  | 0.94                             | 0.45, 1.97                              |

|                                       | Univariate |                   | Multivariate |                      |                             |                                  |                                         |
|---------------------------------------|------------|-------------------|--------------|----------------------|-----------------------------|----------------------------------|-----------------------------------------|
|                                       | Odds Ratio | Credible Interval | Selected %   | Posterior Odds Ratio | Posterior Credible Interval | Conditional Posterior Odds Ratio | Conditional Posterior Credible Interval |
| Schizoaffective vs. Schizophreniform  | 1.50       | 0.83, 2.78        | 1.6%         | 1.00                 | 0.91, 1.10                  | 0.95                             | 0.45, 1.98                              |
| Psychosis NOS vs. Schizophreniform    | 0.53       | 0.23, 1.16        | 4.0%         | 0.98                 | 0.73, 1.30                  | 0.54                             | 0.24, 1.24                              |
| Schizoaffective vs. Psychosis NOS     | 2.63       | 1.35, 6.37        | 1.6%         | 1.00                 | 0.91, 1.10                  | 0.95                             | 0.45, 1.98                              |
| <b>Insurance status</b>               |            |                   |              |                      |                             |                                  |                                         |
| Private vs. Uninsured                 | 1.06       | 0.61, 1.70        | 3.2%         | 1.01                 | 0.88, 1.15                  | 1.30                             | 0.75, 2.25                              |
| Public only vs. Uninsured             | 0.84       | 0.55, 1.42        | 5.0%         | 0.98                 | 0.82, 1.18                  | 0.72                             | 0.44, 1.16                              |
| Private vs. Public                    | 1.25       | 0.77, 2.39        | 3.2%         | 1.01                 | 0.88, 1.16                  | 1.31                             | 0.76, 2.28                              |
| <b>Anxiety or Depressive Symptoms</b> |            |                   |              |                      |                             |                                  |                                         |
| Not present vs. Present               | 0.46       | 0.27, 0.70        | 87.1%        | 0.54                 | 0.29, 1.01                  | 0.50                             | 0.32, 0.77                              |

**TABLE S2. Factors Associated with Antipsychotic Dosing**

|                                                                             | Univariate |                   | Multivariate |                |                   |                            |                   |
|-----------------------------------------------------------------------------|------------|-------------------|--------------|----------------|-------------------|----------------------------|-------------------|
|                                                                             | Beta       | Credible Interval | Selected %   | Posterior Beta | Credible Interval | Conditional Posterior Beta | Credible Interval |
| <b>Prescribed Risperidone Dose For Subjects Prescribed Oral Risperidone</b> |            |                   |              |                |                   |                            |                   |
| <b>Region</b>                                                               |            |                   |              |                |                   |                            |                   |
| West vs. Midwest                                                            | 0.09       | -0.54, 0.96       | 3.2%         | 0.01           | -0.17, 0.19       | 0.34                       | -0.44, 1.13       |
| South vs. Midwest                                                           | -0.56      | -1.37, 0.19       | 5.9%         | -0.03          | -0.31, 0.25       | -0.49                      | -1.18, 0.2        |
| North vs. Midwest                                                           | -0.5       | -1.26, 0.39       | 3.2%         | -0.01          | -0.21, 0.18       | -0.38                      | -1.19, 0.44       |
| North vs. South                                                             | 0.06       | -0.81, 0.67       | 5.7%         | 0.03           | -0.25, 0.3        | 0.48                       | -0.21, 1.17       |
| North vs. West                                                              | -0.59      | -1.66, 0.41       | 3.3%         | -0.01          | -0.2, 0.18        | -0.36                      | -1.15, 0.43       |
| South vs. West                                                              | -0.65      | -1.36, 0.21       | 3.3%         | -0.01          | -0.21, 0.18       | -0.36                      | -1.16, 0.43       |
| <b>Sex</b>                                                                  |            |                   |              |                |                   |                            |                   |
| Female vs. Male                                                             | -0.86      | -1.48, -0.13      | 52.2%        | -0.47          | -1.52, 0.58       | -0.9                       | -1.7, -0.09       |
| <b>Age</b>                                                                  | 0.01       | -0.05, 0.08       | 8.1%         | 0              | -0.02, 0.02       | 0.01                       | -0.07, 0.08       |
| <b>Race</b>                                                                 |            |                   |              |                |                   |                            |                   |
| Other vs. Caucasian                                                         | 0.2        | -0.59, 1.09       | 4.1%         | 0.01           | -0.19, 0.21       | 0.27                       | -0.55, 1.1        |
| African American vs. Caucasian                                              | -0.25      | -0.75, 0.27       | 4.3%         | -0.01          | -0.17, 0.15       | -0.22                      | -0.85, 0.41       |
| Others vs. African American                                                 | 0.44       | -0.38, 1.29       | 4.2%         | 0.01           | -0.19, 0.21       | 0.28                       | -0.55, 1.1        |
| <b>Ethnicity</b>                                                            |            |                   |              |                |                   |                            |                   |
| Hispanic. Vs. non-Hispanic.                                                 | -0.29      | -0.86, 0.44       | 12.9%        | -0.04          | -0.38, 0.29       | -0.35                      | -1.03, 0.34       |
| <b>Diagnosis</b>                                                            |            |                   |              |                |                   |                            |                   |
| Psychosis NOS vs. Schizophrenia                                             | -0.84      | -1.82, -0.01      | 6.4%         | -0.05          | -0.48, 0.39       | -0.73                      | -1.74, 0.27       |
| Schizophreniform vs. Schizophrenia                                          | -0.47      | -1.26, 0.3        | 2.8%         | -0.01          | -0.16, 0.14       | -0.27                      | -1.01, 0.48       |
| Schizoaffective vs. Schizophrenia                                           | -1.19      | -2.05, -0.49      | 16.9%        | -0.16          | -0.93, 0.61       | -0.93                      | -1.81, -0.04      |
| Schizoaffective vs. Schizophreniform                                        | -0.72      | -1.38, 0.01       | 11.5%        | -0.1           | -0.73, 0.53       | -0.87                      | -1.82, 0.09       |
| Psychosis NOS vs. Schizophreniform                                          | -0.37      | -1.34, 0.61       | 4.8%         | -0.03          | -0.39, 0.33       | -0.64                      | -1.72, 0.44       |
| Schizoaffective vs. Psychosis NOS                                           | -0.35      | -1.52, 0.52       | 11.3%        | -0.1           | -0.72, 0.53       | -0.86                      | -1.82, 0.09       |
| <b>Insurance Status</b>                                                     |            |                   |              |                |                   |                            |                   |
| Private Vs. Uninsured                                                       | 0.13       | -0.64, 0.81       | 4.9%         | 0.01           | -0.18, 0.21       | 0.29                       | -0.4, 0.99        |
| Public vs. Uninsured                                                        | -0.52      | -1.14, -0.08      | 15.2%        | -0.08          | -0.54, 0.38       | -0.56                      | -1.18, 0.07       |
| Private vs. Public                                                          | 0.64       | -0.35, 1.35       | 5.5%         | 0.02           | -0.21, 0.24       | 0.34                       | -0.36, 1.05       |

|                                                                           | Univariate |                   | Multivariate |                |                   |                            |                   |
|---------------------------------------------------------------------------|------------|-------------------|--------------|----------------|-------------------|----------------------------|-------------------|
|                                                                           | Beta       | Credible Interval | Selected %   | Posterior Beta | Credible Interval | Conditional Posterior Beta | Credible Interval |
| <b>Antidepressant</b>                                                     |            |                   |              |                |                   |                            |                   |
| No vs. Yes                                                                | -0.16      | -0.85, 0.34       | 9.7%         | -0.02          | -0.25, 0.21       | -0.2                       | -0.83, 0.42       |
| <b>Smoking</b>                                                            |            |                   |              |                |                   |                            |                   |
| No vs. Yes                                                                | -0.43      | -0.94, 0.15       | 16.6%        | -0.06          | -0.43, 0.31       | -0.38                      | -0.98, 0.22       |
| <b>Alcohol</b>                                                            |            |                   |              |                |                   |                            |                   |
| No vs. Yes                                                                | -0.4       | -0.88, 0.28       | 11.3%        | -0.04          | -0.35, 0.28       | -0.32                      | -1.05, 0.41       |
| <b>Marijuana</b>                                                          |            |                   |              |                |                   |                            |                   |
| No vs. Yes                                                                | 0.15       | -0.81, 0.58       | 8%           | -0.01          | -0.2, 0.19        | -0.07                      | -0.75, 0.62       |
| <b>Other drugs</b>                                                        |            |                   |              |                |                   |                            |                   |
| No vs. Yes                                                                | -0.84      | -3.18, 1.09       | 17.6%        | -0.26          | -1.72, 1.2        | -1.46                      | -3.76, 0.84       |
| <b>Prescribed Olanzapine Dose For Subjects Prescribed Oral Olanzapine</b> |            |                   |              |                |                   |                            |                   |
| <b>Region</b>                                                             |            |                   |              |                |                   |                            |                   |
| West vs. Midwest                                                          | -2.4       | -6.63, 3.37       | 3.8%         | -0.06          | -1.21, 1.08       | -1.63                      | -6.57, 3.31       |
| South vs. Midwest                                                         | -0.7       | -9.9, 7.76        | 3.1%         | 0.01           | -1.28, 1.29       | 0.18                       | -7.13, 7.49       |
| North vs. Midwest                                                         | -3.42      | -9.08, 3.2        | 3.5%         | -0.05          | -1.3, 1.2         | -1.41                      | -7.53, 4.72       |
| North vs. South                                                           | -2.69      | -10.3, 2.65       | 3%           | -0.01          | -1.28, 1.27       | -0.24                      | -7.56, 7.09       |
| North vs. West                                                            | -1.03      | -7.02, 4.61       | 3.7%         | 0.06           | -1.07, 1.18       | 1.57                       | -3.39, 6.53       |
| South vs. West                                                            | 1.68       | -4.26, 8.94       | 3.8%         | 0.06           | -1.07, 1.19       | 1.59                       | -3.38, 6.56       |
| <b>Sex</b>                                                                |            |                   |              |                |                   |                            |                   |
| Female vs. Male                                                           | -6.18      | -10.72, -0.94     | 47.7%        | -2.94          | -10.37, 4.49      | -6.16                      | -12.45, 0.14      |
| <b>Age</b>                                                                |            |                   |              |                |                   |                            |                   |
|                                                                           | -0.25      | -0.64, 0.2        | 15.2%        | -0.03          | -0.27, 0.21       | -0.19                      | -0.71, 0.33       |
| <b>Race</b>                                                               |            |                   |              |                |                   |                            |                   |
| Other vs. Caucasian                                                       | 1.1        | -5.59, 8.48       | 5%           | 0.05           | -1.67, 1.76       | 0.9                        | -6.55, 8.34       |
| African American vs. Caucasian                                            | 1.52       | -2.55, 5.62       | 5.5%         | 0.08           | -1.35, 1.5        | 1.38                       | -4.12, 6.87       |
| Others vs. African American                                               | -0.41      | -7.06, 6.44       | 5%           | 0.04           | -1.67, 1.76       | 0.83                       | -6.66, 8.32       |
| <b>Ethnicity</b>                                                          |            |                   |              |                |                   |                            |                   |
| Hispanic. Vs. non-Hispanic.                                               | 0.03       | -4.71, 6          | 11.2%        | -0.02          | -1.99, 1.95       | -0.18                      | -6.06, 5.69       |
| <b>Diagnosis</b>                                                          |            |                   |              |                |                   |                            |                   |
| Psychosis NOS vs. Schizophrenia                                           | 1.68       | -6.13, 8.22       | 3.1%         | 0.05           | -1.79, 1.89       | 1.59                       | -8.31, 11.48      |
| Schizophreniform vs. Schizophrenia                                        | 1.84       | -4.03, 7.76       | 4.8%         | 0.12           | -1.45, 1.69       | 2.52                       | -2.81, 7.84       |
| Schizoaffective vs. Schizophrenia                                         | -4.36      | -10.01, 0.28      | 9.6%         | -0.49          | -4.13, 3.15       | -5.1                       | -11.96, 1.77      |
| Schizoaffective vs. Schizophreniform                                      | -6.18      | -12.24, 0.45      | 9.8%         | -0.51          | -4.21, 3.19       | -5.15                      | -12.04, 1.73      |

|                                    | Univariate |                   | Multivariate |                |                   |                            |                   |
|------------------------------------|------------|-------------------|--------------|----------------|-------------------|----------------------------|-------------------|
|                                    | Beta       | Credible Interval | Selected %   | Posterior Beta | Credible Interval | Conditional Posterior Beta | Credible Interval |
| Psychosis NOS vs. Schizophreniform | -0.12      | -10.73, 10.63     | 3.2%         | 0.05           | -1.79, 1.89       | 1.54                       | -8.36, 11.43      |
| Schizoaffective vs. Psychosis NOS  | -5.96      | -13.98, -0.25     | 9.7%         | -0.5           | -4.18, 3.18       | -5.14                      | -12.04, 1.76      |
| <b>Insurance Status</b>            |            |                   |              |                |                   |                            |                   |
| Private Vs. Uninsured              | 1.99       | -4.13, 7.45       | 6.9%         | 0.16           | -1.72, 2.05       | 2.36                       | -3.26, 7.98       |
| Public vs. Uninsured               | -0.6       | -5.11, 2.6        | 5.9%         | -0.11          | -1.8, 1.58        | -1.86                      | -7.86, 4.15       |
| Private vs. Public                 | 2.59       | -6.35, 8.89       | 7%           | 0.17           | -1.76, 2.1        | 2.41                       | -3.28, 8.11       |
| <b>Antidepressant</b>              |            |                   |              |                |                   |                            |                   |
| No vs. Yes                         | -3.4       | -8.65, 0.52       | 26.8%        | -0.99          | -5.19, 3.2        | -3.71                      | -8.91, 1.5        |
| <b>Smoking</b>                     |            |                   |              |                |                   |                            |                   |
| No vs. Yes                         | -3.47      | -7.4, 0.89        | 21.9%        | -0.68          | -4.16, 2.81       | -3.09                      | -8.27, 2.09       |
| <b>Alcohol</b>                     |            |                   |              |                |                   |                            |                   |
| No vs. Yes                         | 0.36       | -2.79, 4.69       | 12.9%        | 0.16           | -1.87, 2.2        | 1.27                       | -3.92, 6.45       |
| <b>Marijuana</b>                   |            |                   |              |                |                   |                            |                   |
| No vs. Yes                         | -0.98      | -5.7, 4.22        | 11.9%        | -0.04          | -1.97, 1.89       | -0.35                      | -5.92, 5.21       |
| <b>Other drugs</b>                 |            |                   |              |                |                   |                            |                   |
| No vs. Yes                         | 1.4        | -15.57, 15.48     | 11.5%        | 0.25           | -5.53, 6.02       | 2.14                       | -14.44, 18.73     |
